# Supplementary material
Source: PubMed Central journal article supplement (PMC3133786)
Supplement: Supp_Data.pdf [file Supp_Data.pdf]

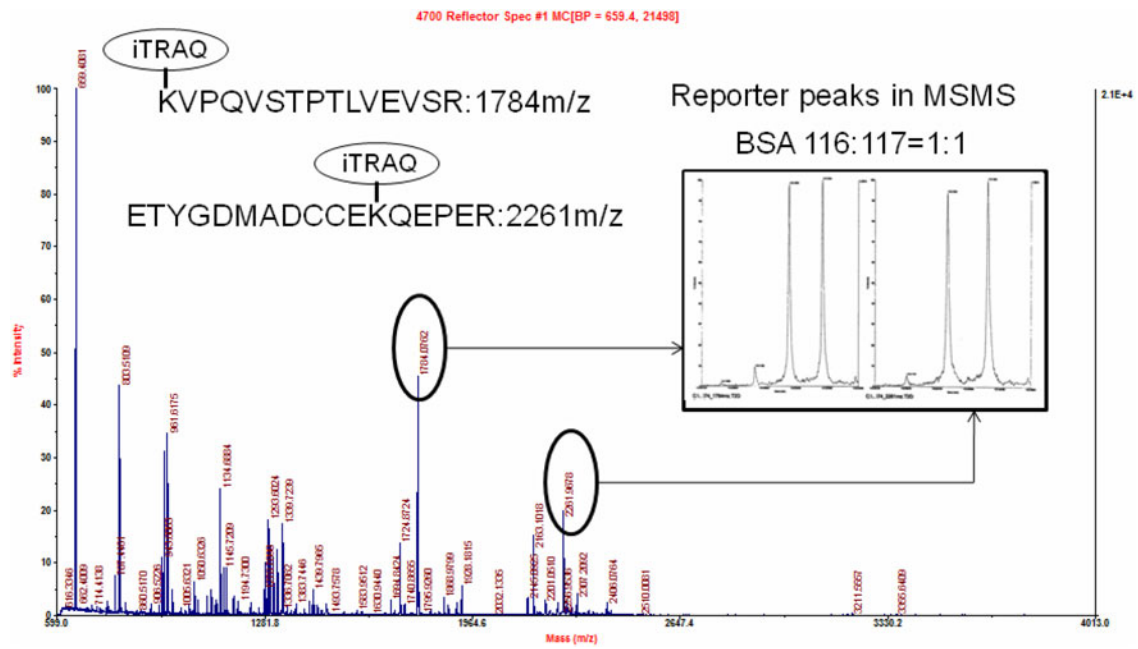

SUPPLEMENTARY FIG. 1. Representative precursor peak of BSA labeled with iTRAQ in MS.

SUPPLEMENTARY TABLE S1. CARBOXYLATED PROTEINS DETECTED IN YEAST SAMPLES

| N                        | Accession                 | Name                         | Elongation factor<br>1-alpha | Cov (%) | # of unique peptides (99% confidence) |         |         | Sequence | Modifications                 |                                       |                            |
|--------------------------|---------------------------|------------------------------|------------------------------|---------|---------------------------------------|---------|---------|----------|-------------------------------|---------------------------------------|----------------------------|
|                          |                           |                              |                              |         | 115:114                               | 116:114 | 117:114 |          |                               |                                       |                            |
| 1                        | P02994 EF1A_YEAST         | Elongation factor<br>1-alpha |                              | 36.9    | 0.688                                 | 0.403   | 0.311   | 15       | AFSEYPLGRF                    | iTRAQ4plex(S)@3                       |                            |
|                          |                           |                              |                              |         |                                       |         |         |          | AFSEYPLGRFA                   |                                       |                            |
|                          |                           |                              |                              |         |                                       |         |         |          | AIDAEQPSRPTDKPLRLPLQD         | iTRAQ4plex(K)@14                      |                            |
|                          |                           |                              |                              |         |                                       |         |         |          | AIDAEQPSRPTDKPLRLPLQDVY       | iTRAQ4plex(K)@14                      |                            |
|                          |                           |                              |                              |         |                                       |         |         |          | AIDAEQPSRPTDKPLRLPLQDVYK      | iTRAQ4plex(K)@14;<br>iTRAQ4plex(K)@25 |                            |
|                          |                           |                              |                              |         |                                       |         |         |          | ATTNAPWYKGWE                  | iTRAQ4plex(K)@9                       |                            |
|                          |                           |                              |                              |         |                                       |         |         |          | ATTNAPWYKGWEKE                | iTRAQ4plex(K)@9;                      |                            |
|                          |                           |                              |                              |         |                                       |         |         |          | HALLAFTLGVRLIVAVNKMSYKWD      | iTRAQ4plex(K)@13                      |                            |
|                          |                           |                              |                              |         |                                       |         |         |          |                               | iTRAQ4plex(K)@19;                     |                            |
|                          |                           |                              |                              |         |                                       |         |         |          |                               | iTRAQ4plex(K)@24                      |                            |
|                          |                           |                              |                              |         |                                       |         |         |          | LGKGSFKYAWVLD                 | iTRAQ4plex(K)@3;                      |                            |
|                          |                           |                              |                              |         |                                       |         |         |          |                               | iTRAQ4plex(K)@7                       |                            |
|                          |                           |                              |                              |         |                                       |         |         |          |                               | iTRAQ4plex(K)@3;                      |                            |
|                          |                           |                              |                              |         |                                       |         |         |          |                               | iTRAQ4plex(K)@7;                      |                            |
|                          |                           |                              |                              |         |                                       |         |         |          |                               | iTRAQ4plex(K)@14;                     |                            |
|                          | iTRAQ4plex(K)@16          |                              |                              |         |                                       |         |         |          |                               |                                       |                            |
|                          | Methyl(L)@9;              |                              |                              |         |                                       |         |         |          |                               |                                       |                            |
|                          | FormaldehydeAdduct(W)@10; |                              |                              |         |                                       |         |         |          |                               |                                       |                            |
|                          | No iTRAQ4plex(K)@11;      |                              |                              |         |                                       |         |         |          |                               |                                       |                            |
|                          | Oxidation(F)@12           |                              |                              |         |                                       |         |         |          |                               |                                       |                            |
| 2                        | P00925 ENO2_YEAST         | Enolase 2                    |                              | 25.2    | 1.555                                 | 1.633   | 2.215   | 5        | TSNFIKKVGYNPKTVPFVPSGWNQDNMIE | iTRAQ4plex(K)@6;                      |                            |
|                          |                           |                              |                              |         |                                       |         |         |          |                               | iTRAQ4plex(K)@7;                      |                            |
|                          |                           |                              |                              |         |                                       |         |         |          |                               | iTRAQ4plex(K)@13                      |                            |
|                          |                           |                              |                              |         |                                       |         |         |          |                               | Carbamyl@N-term;                      |                            |
|                          |                           |                              |                              |         |                                       |         |         |          |                               | Carbamyl@K@8                          |                            |
|                          |                           |                              |                              |         |                                       |         |         |          |                               | Carbamyl@N-term;                      |                            |
|                          |                           |                              |                              |         |                                       |         |         |          |                               | iTRAQ4plex(K)@8;                      |                            |
|                          |                           |                              |                              |         |                                       |         |         |          |                               | iTRAQ4plex(K)@12                      |                            |
|                          |                           |                              |                              |         |                                       |         |         |          |                               | iTRAQ4plex(K)@3                       |                            |
|                          |                           |                              |                              |         |                                       |         |         |          |                               | iTRAQ4plex(K)@7                       |                            |
|                          |                           |                              |                              |         |                                       |         |         |          |                               | iTRAQ4plex(K)@17                      |                            |
|                          |                           |                              |                              |         |                                       |         |         |          |                               | iTRAQ4plex(K)@3;                      |                            |
|                          |                           |                              |                              |         |                                       |         |         |          |                               | iTRAQ4plex(K)@6;                      |                            |
|                          |                           |                              |                              |         |                                       |         |         |          |                               | iTRAQ4plex(K)@12                      |                            |
|                          |                           |                              |                              |         |                                       |         |         |          | 3                             | P10592 HSP72_YEAST                    | Heat shock<br>protein SSA2 |
| SIKAAQDSFAANWGMVSHRSGETE | iTRAQ4plex(K)@3           |                              |                              |         |                                       |         |         |          |                               |                                       |                            |
| AEKFKEEDEKE              | iTRAQ4plex(K)@3;          |                              |                              |         |                                       |         |         |          |                               |                                       |                            |
|                          | iTRAQ4plex(K)@5;          |                              |                              |         |                                       |         |         |          |                               |                                       |                            |
|                          | iTRAQ4plex(K)@10          |                              |                              |         |                                       |         |         |          |                               |                                       |                            |
|                          | Methyl(L)@1               |                              |                              |         |                                       |         |         |          |                               |                                       |                            |
|                          | iTRAQ4plex(K)@7           |                              |                              |         |                                       |         |         |          |                               |                                       |                            |
|                          | iTRAQ4plex(K)@13          |                              |                              |         |                                       |         |         |          |                               |                                       |                            |
|                          | iTRAQ4plex(K)@13;         |                              |                              |         |                                       |         |         |          |                               |                                       |                            |
|                          | iTRAQ4plex(K)@21          |                              |                              |         |                                       |         |         |          |                               |                                       |                            |
|                          | iTRAQ4plex(K)@8           |                              |                              |         |                                       |         |         |          |                               |                                       |                            |
|                          |                           |                              |                              |         |                                       |         |         |          |                               |                                       |                            |
|                          | LSGIPPAPRGVPPQIE          |                              |                              |         |                                       |         |         |          |                               |                                       |                            |
|                          | LSGIPPAPRGVPPQIE          |                              |                              |         |                                       |         |         |          |                               |                                       |                            |
|                          | SIAYSLKNTISE              |                              |                              |         |                                       |         |         |          |                               |                                       |                            |
|                          | TIAWLDNSNTTATKEE          |                              |                              |         |                                       |         |         |          |                               |                                       |                            |
|                          | TIAWLDNSNTTATKEEFFDDQLKE  |                              |                              |         |                                       |         |         |          |                               |                                       |                            |
|                          | VANPIMSKLYQAGGAPE         |                              |                              |         |                                       |         |         |          |                               |                                       |                            |

|   |                    |                                  |      |       |       |       |   |                                                                                                                                                                         |                                                                                                                                                                                                                         |
|---|--------------------|----------------------------------|------|-------|-------|-------|---|-------------------------------------------------------------------------------------------------------------------------------------------------------------------------|-------------------------------------------------------------------------------------------------------------------------------------------------------------------------------------------------------------------------|
| 4 | P34760 TSA1_YEAST  | Peroxiredoxin TSA1               | 21.4 | 0.388 | 0.327 | 0.329 | 5 | GGLGPNIPLLADTNHLSLRD                                                                                                                                                    | iTRAQ4plex(K)@12<br>Oxidation(W)@6;<br>iTRAQ4plex(K)@12<br>Dioxidation(W)@6;<br>iTRAQ4plex(K)@12<br>iTRAQ4plex(K)@13<br>iTRAQ4plex(K)@9<br>iTRAQ4plex(K)@11;<br>iTRAQ4plex(K)@14<br>iTRAQ4plex(K)@13<br>iTRAQ4plex(K)@7 |
| 5 | P22803 TRX2_YEAST  | Thioredoxin II                   | 64.4 | 2.37  | 2.278 | 2.088 | 4 | KFAEQYSDAAFYKLDVDE<br>QYSDAAFYKLDVDE<br>VSSMPTLIFYKGGKE<br>VTRVVGANPAAIKQAIASNV<br>DLRFQVK                                                                              |                                                                                                                                                                                                                         |
| 6 | P00549 KPYK1_YEAST | Pyruvate kinase 1                | 22   | 1.132 | 1.169 | 1.322 | 7 | IRIGTTTNDVDYPIPPNHE<br>KEPVSDWTDVVEARINFGIE<br>KEPVSDWTDVVEARINFGIEKAKE<br>LDTKGPEIRGTGTTTNDVDYPIPPNHE<br>LYPGRPLAIALDITKGPE<br>TGTTTNDVDYPIPPNHE<br>KADRLLWIPVNRSWRLNE | iTRAQ4plex(K)@1<br>iTRAQ4plex(K)@1;<br>iTRAQ4plex(K)@21;<br>iTRAQ4plex(K)@23<br>iTRAQ4plex(T)@3;<br>iTRAQ4plex(K)@4<br>iTRAQ4plex(K)@14<br>iTRAQ4plex(T)@5<br>iTRAQ4plex(K)@1                                           |
| 7 | P00950 PMG1_YEAST  | Phosphoglycerate mutase 1        | 30.8 | 0.841 | 0.489 | 0.577 | 4 | KKVYYPDVLYTSKLSRAIQTANIALE<br>KNLFTGWVVDVKLSAKGQQE<br>PKLVLVRHGQSEWNE                                                                                                   | iTRAQ4plex(K)@1;<br>iTRAQ4plex(K)@2;<br>iTRAQ4plex(K)@12<br>iTRAQ4plex(K)@1;<br>iTRAQ4plex(K)@11;<br>iTRAQ4plex(K)@15<br>Protein Terminal<br>iTRAQ4plex@N-term;<br>iTRAQ4plex(K)@2<br>iTRAQ4plex(K)@16                  |
| 8 | P06169 PDC1_YEAST  | Pyruvate decarboxylase isozyme 1 | 11.5 | 0.963 | 0.578 | 0.466 | 4 | IQGWHDHLSLLPTFGAKDYE<br>KLIHGPKAQYNE<br>QHPRYGGVYVGTLSKPE<br>WDKLTQDKSFNDNSKIR                                                                                          | iTRAQ4plex(K)@1;<br>iTRAQ4plex(K)@7<br>iTRAQ4plex(K)@15<br>iTRAQ4plex(K)@3;<br>iTRAQ4plex(K)@8;<br>iTRAQ4plex(K)@15<br>iTRAQ4plex(K)@6;<br>iTRAQ4plex(K)@10                                                             |
| 9 | P07284 SYSC_YEAST  | Seryl-tRNA synthetase,           | 3    | 2.133 | 2.454 | 3.142 | 1 | IISDYKDWVYKTRFE                                                                                                                                                         |                                                                                                                                                                                                                         |

(Continued)

SUPPLEMENTARY TABLE S1. CONTINUED

| <i>N</i> | <i>Accession</i>   | <i>Name</i>                                           | <i>Cov (%)</i> | 115:114 | 116:114 | 117:114 | <i># of unique peptides (99% confidence)</i> | <i>Sequence</i>                                                                                                                                                          | <i>Modifications</i>                                                                                                                                                                                                                                   |
|----------|--------------------|-------------------------------------------------------|----------------|---------|---------|---------|----------------------------------------------|--------------------------------------------------------------------------------------------------------------------------------------------------------------------------|--------------------------------------------------------------------------------------------------------------------------------------------------------------------------------------------------------------------------------------------------------|
| 10       | P00359 G3P3_YEAST  | Glyceralddehyde-3-phosphate dehydrogenase<br>3        | 7.5            | 0.844   | 0.849   | 0.883   | 2                                            | RDPANLPWGSSNVDIAIDSTGVFKE                                                                                                                                                | iTRAQ4plex(K)@24                                                                                                                                                                                                                                       |
| 11       | P00815 HIS2_YEAST  | Histidine biosynthesis trifunctional protein          | 1.6            | 0.923   | 0.815   | 0.861   | 1                                            | RDPANLPWGSSNVDIAIDSTGVFKE<br>QLNVPKERVVVEE                                                                                                                               | Deamidated(N)@12;<br>iTRAQ4plex(K)@24<br>iTRAQ4plex(K)@6                                                                                                                                                                                               |
| 12       | Q02642 NACB1_YEAST | Nascent polypeptide-associated complex subunit beta-1 | 19.7           | 0.949   | 0.548   | 0.764   | 2                                            | KNLQDLFPGIISQLGPE                                                                                                                                                        | iTRAQ4plex(K)@1                                                                                                                                                                                                                                        |
| 13       | P00560 PGK_YEAST   | Phosphoglycerate kinase                               | 37.3           | 0.584   | 0.41    | 0.485   | 8                                            | VRSAGGNVYVFGE<br>AFGTAHRAHSSMVGFDLPQRAAGFLE<br>HHPRYVVLASHLGRPNGERNE<br>LKYFGKALE<br>LQSLGKDVTFLNDCVGPEVE<br>NLRVHIEEE<br>NPTRPFLAILGGAKVAD<br>SRKLFAATVAKAKTIWVNGPPGVFE | iTRAQ4plex(K)@2;<br>iTRAQ4plex(K)@6<br>iTRAQ4plex(K)@7;<br>No Carbamidomethyl(C)@15<br>iTRAQ4plex(K)@14<br>iTRAQ4plex(K)@3;<br>iTRAQ4plex(K)@11;<br>iTRAQ4plex(K)@13<br>iTRAQ4plex(K)@20;<br>iTRAQ4plex(K)@25<br>iTRAQ4plex(K)@11;<br>iTRAQ4plex(K)@15 |
| 14       | P00330 ADH1_YEAST  | Alcohol dehydrogenase<br>1                            | 15.5           | 0.926   | 0.465   | 0.252   | 3                                            | ALDFFARGLVKSPIKVVGLSTLPE                                                                                                                                                 | iTRAQ4plex(K)@1;<br>iTRAQ4plex(K)@14<br>iTRAQ4plex(K)@15                                                                                                                                                                                               |
| 15       | P16474 GRP78_YEAST | 78 kDa glucose-regulated protein homolog precursor    | 4              | 2.224   | 2.155   | 2.288   | 2                                            | KGQIVGRYVVDTSK<br>LFRSIGGEVFDFTKE<br>LTGIPPAPRGVPOIE                                                                                                                     |                                                                                                                                                                                                                                                        |
| 16       | P14540 ALF_YEAST   | Fructose-bisphosphate aldolase                        | 5              | 1.227   | 1.143   | 1.786   | 1                                            | TAAIEDFDEKFE<br>EKPLFLVFHGGSGTVQE                                                                                                                                        | iTRAQ4plex(K)@10<br>iTRAQ4plex(K)@2                                                                                                                                                                                                                    |
| 17       | P12398 HSP77_YEAST | Heat shock protein SSC1, mitochondrial precursor      | 3              | 1.911   | 2.009   | 1.51    | 1                                            | STNGDTHLGGEDFDIYLLRE                                                                                                                                                     | iTRAQ4plex(T)@2;<br>Deamidated(N)@3                                                                                                                                                                                                                    |

|    |        |             |                                                |      |       |       |       |   |                                                                                                                         |                                                                                                                                                                                                                                                                                                                                                                                                                                                            |
|----|--------|-------------|------------------------------------------------|------|-------|-------|-------|---|-------------------------------------------------------------------------------------------------------------------------|------------------------------------------------------------------------------------------------------------------------------------------------------------------------------------------------------------------------------------------------------------------------------------------------------------------------------------------------------------------------------------------------------------------------------------------------------------|
| 18 | P17967 | PDI_YEAST   | Protein disulfide-isomerase precursor          | 3.6  | 2.79  | 1.213 | 0.628 | 1 | SVVYQGSRSLSLDFDIKE                                                                                                      | iTRAQ4plex(K)@18                                                                                                                                                                                                                                                                                                                                                                                                                                           |
| 19 | P05749 | RL22A_YEAST | 60S ribosomal protein                          | 32.2 | 0.779 | 0.529 | 0.281 | 2 | NGVFDPAASYAKYLIDHIKVE                                                                                                   | iTRAQ4plex(K)@11;<br>iTRAQ4plex(K)@18                                                                                                                                                                                                                                                                                                                                                                                                                      |
| 20 | P10591 | HSP71_YEAST | Heat-shock protein SSA1                        | 9.3  | 0.674 | 0.686 | 0.649 | 5 | YRLAFYQVTPEEDEEEDDEE<br>AEKFKEEDEKE<br><br>LSGPPAPRGVPQIE<br>SIAYSLKNITISE<br>TISWLDSNITASKEE<br>TISWLDSNITASKEEFDDKIKE | iTRAQ4plex(K)@3;<br>iTRAQ4plex(K)@5;<br>iTRAQ4plex(K)@10<br><br>iTRAQ4plex(K)@7<br>iTRAQ4plex(K)@13<br>iTRAQ4plex(K)@13;<br>iTRAQ4plex(K)@19;<br>iTRAQ4plex(K)@21<br>iTRAQ4plex(K)@6;<br>iTRAQ4plex(K)@8;<br>iTRAQ4plex(K)@12<br>iTRAQ4plex(K)@15<br>iTRAQ4plex(K)@6;<br>iTRAQ4plex(K)@7;<br>iTRAQ4plex(K)@8;<br>iTRAQ4plex(K)@11;<br>iTRAQ4plex(K)@15<br>iTRAQ4plex(K)@1;<br>iTRAQ4plex(K)@7;<br>iTRAQ4plex(K)@22<br>iTRAQ4plex(K)@6;<br>iTRAQ4plex(K)@13 |
| 21 | P32589 | HSP7F_YEAST | Heat-shock protein homolog SSE1                | 4.8  | 0.96  | 0.785 | 0.793 | 2 | GFDSIKAKYIAKYEE                                                                                                         | iTRAQ4plex(K)@14                                                                                                                                                                                                                                                                                                                                                                                                                                           |
| 22 | P25294 | SIS1_YEAST  | Protein SIS1                                   | 12.8 | 2.301 | 1.424 | 2.746 | 2 | LASLGNIIIRGRYLAKEEE<br>DLFVGKKKSFKGRKGPHGASE                                                                            | iTRAQ4plex(K)@13                                                                                                                                                                                                                                                                                                                                                                                                                                           |
| 23 | P46672 | G4P1_YEAST  | GU4 nucleic-binding protein 1                  | 3.7  | 0.624 | 0.354 | 0.346 | 1 | SLIISKYPVSFTKE                                                                                                          | iTRAQ4plex(K)@13                                                                                                                                                                                                                                                                                                                                                                                                                                           |
| 24 | P16140 | VATB_YEAST  | Vacuolar ATP synthase subunit B                | 2.9  | 0.583 | 0.349 | 0.095 | 1 | SLDQAWSLLRIYPKE                                                                                                         | iTRAQ4plex(K)@14                                                                                                                                                                                                                                                                                                                                                                                                                                           |
| 25 | P11076 | ARF1_YEAST  | ADP-ribosylation factor 1                      | 9.4  | 0.556 | 0.293 | 0.218 | 1 | LRNAAWLVFANKQDLPE                                                                                                       | iTRAQ4plex(K)@12                                                                                                                                                                                                                                                                                                                                                                                                                                           |
| 26 | Q3E841 | YN034_YEAST | Uncharacterized protein YNR034W-A              | 27.6 | 1.109 | 0.184 | 0.806 | 1 | DAQYIGHAFKKAGHFIVYFIPKKNRE                                                                                              | Deamidated(Q)@3;<br>iTRAQ4plex(K)@10;<br>iTRAQ4plex(K)@11;<br>iTRAQ4plex(K)@22;<br>iTRAQ4plex(K)@24<br>iTRAQ4plex(K)@10;<br>iTRAQ4plex(K)@11;<br>iTRAQ4plex(K)@14                                                                                                                                                                                                                                                                                          |
| 27 | P32911 | SUI1_YEAST  | Eukaryotic translation initiation factor eIF-1 | 16.7 | 0.568 | 0.316 | 0.19  | 1 | FMISQLGLQKKNIKIHGF                                                                                                      |                                                                                                                                                                                                                                                                                                                                                                                                                                                            |
| 28 | Q12074 | SPEE_YEAST  | Spermidine synthase                            | 4.4  |       |       |       | 1 | ITHPTIVDGVFRE                                                                                                           |                                                                                                                                                                                                                                                                                                                                                                                                                                                            |
| 29 | P38013 | AHP1_YEAST  | Peroxiredoxin type-2                           | 10.2 |       |       |       | 1 | LAVGDGVYWSGRWAMVVE                                                                                                      |                                                                                                                                                                                                                                                                                                                                                                                                                                                            |
| 30 | P32324 | EF2_YEAST   | Elongation factor 2                            | 3.3  |       |       |       | 2 | DLYQTFARIVE                                                                                                             |                                                                                                                                                                                                                                                                                                                                                                                                                                                            |
| 31 | Q01560 | INOP3_YEAST | Nucleolar protein 3                            | 4.1  |       |       |       | 1 | LSNTRLFVRPFPPLDVQE                                                                                                      |                                                                                                                                                                                                                                                                                                                                                                                                                                                            |

SUPPLEMENTARY TABLE S2. FUNCTIONAL AND PATHWAY ANALYSIS OF IDENTIFIED PROTEINS

| #  | Gene      | Mw (Da)       | PI       | Molecules/cell | Function* | Localization** | Pathway                                     | Cofactor                        |
|----|-----------|---------------|----------|----------------|-----------|----------------|---------------------------------------------|---------------------------------|
| 1  | TEF2/TEF1 | 50,032        | 9.72     | 450/377        | 4         | C              | translation_elongation of peptide synthesis |                                 |
| 2  | ENO2/ENO1 | 46,914/46,816 | 5.88/6.6 | 2,610/76,700   | 1         | C              | glycolysis                                  | magnesium                       |
| 3  | SSA2      | 69,469        | 4.77     | 364,000        | 3,5       | W,C,N          |                                             |                                 |
| 4  | TSA1      | 21,590        | 4.87     | 378,000        | 3         | C,PC           |                                             |                                 |
| 5  | TRX2      | 11,204        | 4.62     | 17,200         | 3         | C,N            |                                             |                                 |
| 6  | CDC19     | 54,544        | 7.66     | 291,000        | 1         | C              | glycolysis                                  | magnesium, potassium            |
| 7  | GPM1      | 27,608        | 9.65     | 172,000        | 1         | C              | glycolysis                                  | thiamine                        |
| 8  | PDC1      | 61,495        | 6.12     | 8,970          | 1         | C,N, A         |                                             | pyrophosphate, Mg <sup>2+</sup> |
| 9  | SES1      | 53,309        | 5.98     |                | 4         | C              |                                             |                                 |
| 10 | TDH3      | 35,746        | 6.96     | 169,000        | 1         | C,N            | glycolysis                                  |                                 |
| 11 | HIS4      | 87,721        | 5.04     | 521            | 1         | C              | histidine biosynthesis                      |                                 |
| 12 | EGD1      | 17,020        | 6.53     | 18,000         | 2         | C,N            |                                             |                                 |
| 13 | PGK1      | 44,738        | 7.77     | 314,000        | 1         | C,N            | gluconeogenesis, glycolysis                 |                                 |
| 14 | ADH1      | 36,849        | 6.66     |                | 1         | C              |                                             | zinc                            |
| 15 | KAR2      | 74,467        | 4.62     | 337,000        | 3,5       | ER,A           |                                             |                                 |
| 16 | FBA1      | 39,620        | 5.65     | 1,020,000      | 1         | C              | glycolysis                                  | zinc                            |
| 17 | SSC1      | 70,627        | 5.34     |                | 3         | M              |                                             |                                 |
| 18 | PDI1      | 58,227        | 4.22     |                | 3         | C,ER, V        |                                             |                                 |
| 19 | RPL22A    | 13,693        | 6.01     | 60,400         | 4         | C              |                                             |                                 |
| 20 | SSA1      | 69,657        | 4.82     | 269,000        | 3,5       | C,N            |                                             |                                 |
| 21 | SSE1      | 77,366        | 4.97     | 71,700         | 3         | C              |                                             |                                 |
| 22 | SIS1      | 37,590        | 9.86     | 20,300         | 3         | C,N            |                                             |                                 |
| 23 | ARC1      | 42,084        | 8.01     | 57,700         | 2         | C              |                                             |                                 |
| 24 | VMA2      | 57,749        | 4.79     | 131,000        | 5         | V              |                                             |                                 |
| 25 | ARF1      | 20,529        | 7.46     | 19,300         | 5         | G, PC          |                                             |                                 |
| 26 | YNR034W-A | 10,781        | 9.79     | 2,820          | 6         | C              |                                             |                                 |
| 27 | SUI1      | 12,312        | 8.1      |                | 4         | C              |                                             |                                 |
| 28 | SPE3      | 33,324        | 5.33     |                | 1         | C,N,M          | polyamine biosynthesis                      |                                 |
| 29 | AHP1      | 19,115        | 4.87     | 16,200         | 3         | C,N,P          | protection against oxidizing agents         | Thioredoxin                     |
| 30 | EFT1/EFT2 | 93,288        | 6.25     | 82,700/78,100  | 4         | C              | elongation of peptide synthesis             |                                 |
| 31 | NPL3      | 45,407        | 5.35     | 78,700         | 2         | N              | Np13/Mtr10p nuclear import pathway          |                                 |

\*1: metabolism, 2: transcription, 3: cell defense and protein folding, 4: protein synthesis, 5: cell transport, 6: others and unknown.

\*\*A: Ambiguous, C: Cytoplasm, N: Nucleus, ER: Endoplasmic Reticulum, M: Mitochondria, P: Peroxisome, W: Cell wall PC: Punctate composite, G: Golgi, V: Vacuole.
